# Supplementary material for: Contribution of Single-Fiber Evaluation on Monitoring Outcomes Following Injection of Botulinum Toxin-A: A Narrative Review of the Literature
Source: MDPI journal article supplement (doi:10.3390/toxins13050356), 2021-05-17
Supplement: s1 [file s1]

# Supplementary Materials: Contribution of Single-Fiber Evaluation on Monitoring Outcomes Following Injection of Botulinum Toxin-A: a Narrative Review of the Literature

Hélène Moron, Corine Gagnard-Landra, David Guiraud and Arnaud Dupeyron

Table S1. Jitter normal value reference for each study.

| Authors                       | OO                                                    | Frontal                     | EDC                                                                                          | BB           | TA                                      | Other muscles      |
|-------------------------------|-------------------------------------------------------|-----------------------------|----------------------------------------------------------------------------------------------|--------------|-----------------------------------------|--------------------|
| Sanders et al. 1986 [1]       | <30                                                   | <30                         | <34                                                                                          | <30          | US                                      |                    |
| Lange et al. 1987 [2]         | US                                                    | US                          | <34                                                                                          | US           | US                                      |                    |
| Olney et al. 1988 [3]         | US                                                    | US                          | US                                                                                           | <28.9 ± 10.9 | US                                      |                    |
| Lange et al. 1991 [4]         | US                                                    | US                          | Reference elsewhere [122]                                                                    |              |                                         |                    |
| Girlanda et al. 1992 [5]      | US                                                    | US                          | No reference, Comparison to baseline value                                                   | US           | US                                      |                    |
| Garner et al. 1993 [6]        | US                                                    | US                          | Reference elsewhere [122]                                                                    | US           | Reference elsewhere [122]               |                    |
| Girlanda et al. 1996 [7]      | No reference, Comparison to baseline value            | US                          | US                                                                                           | US           | US                                      |                    |
| Bogucki et al. 1999 [8]       | <50 years: 27<br>≥50 years: 29                        | US                          | US                                                                                           | US           | US                                      |                    |
| Bakheit et al. 1997 [9]       | US                                                    | US                          | < 57                                                                                         | US           | US                                      |                    |
| Bhatia et al. 1999 [10]       | US                                                    | US                          | US                                                                                           | US           | US                                      |                    |
| Schweizer et al. 1999 [11]    | US                                                    | US                          | US                                                                                           | US           | US                                      | Thyroarythenoid US |
| Tang et al. 2000 [12]         | US                                                    | US                          | Not precisely defined: “normal before injection”, pre-injection value written: 29.9 and 28.5 | US           | No precision “the changes were similar” |                    |
| Roche et al. 2008 [13]        | <30                                                   | US                          | <40                                                                                          | US           | US                                      |                    |
| Osio et al. 2010 [14]         | US                                                    | US                          | Reference elsewhere [60]                                                                     | US           | US                                      |                    |
| Schnitzler et al. 2011 [15]   | <10% of pairs exceeded 30 µs<br>Or mean jitter <19 µs | US                          | <10% of pairs exceeded 40 µs<br>Or mean jitter <24 µs                                        | US           | US                                      |                    |
| Alimohammadi et al. 2014 [16] | <34                                                   | US                          | US                                                                                           | US           | US                                      |                    |
| Punga et al. 2015 [17]        | US                                                    | Contralateral frontalis: US | US                                                                                           | US           | US                                      |                    |
| Ruet et al. 2015 [18]         | Mean jitter <20 µs<br>Individual jitter <30 µs        | US                          | Mean jitter <25 µs<br>Individual jitter <40 µs                                               | US           | US                                      |                    |
| Szuch et al. 2017 [19]        | US                                                    | US                          | Mean jitter: Voluntary SFEMG: <43,8<br>Stimulated SFEMG: <25                                 | US           | US                                      |                    |

|                             |    |    |    |    |    |                                    |
|-----------------------------|----|----|----|----|----|------------------------------------|
| Lispi et al. 2018 [20]      | US | US | US | US | US | Injected EDB and contralateral: US |
| Leonardi et al. 2019 [21]   | US | US | US | US | US | Deltoid: US                        |
| Timmermans et al. 2019 [22] | US | US | US | US | US |                                    |
| Punga et al. 2020 [23]      | US | US | US | US | US | Deltoid: US                        |
| Eleopra et al. 2020 [24]    | US | US | US | US | US | ADM: US                            |

US: unspecified.

**Table S2.** Study characteristics.

| Authors                 | Population<br>Age (years)-Sex by<br>patient<br>Number of patient by<br>pathology (n)                                                  | BoNT-A<br>Brand Name ®<br>Number of injections<br>Dose<br>Previous injection                                                     | Muscle(s) studied          | SFEMG<br>Device used<br>Calculation jitter<br>methodology                                  | Interval between<br>BoNT-A and SFEMG<br>Jitter<br>MCD in µs; By patient<br>and muscle                                                                                                                                                                                                                                                                                     |
|-------------------------|---------------------------------------------------------------------------------------------------------------------------------------|----------------------------------------------------------------------------------------------------------------------------------|----------------------------|--------------------------------------------------------------------------------------------|---------------------------------------------------------------------------------------------------------------------------------------------------------------------------------------------------------------------------------------------------------------------------------------------------------------------------------------------------------------------------|
| Sanders et al. 1986 [1] | age and sex US<br>BSP n = 4                                                                                                           | Botox®<br>1 injection<br>except #1 with<br>2 injections<br>All patients: 12.5 MLU<br>Previous: US                                | OO<br>EDC<br>Frontal<br>BB | Device: US ;<br>Standard electrode<br>No description                                       | #1<br>D -5; OO: 30; Frontal: 24;<br>EDC: 30<br>D 1: OO: 90; Frontal: 21;<br>EDC: US<br>D 2: OO:106; Frontal: 56;<br>EDC: US<br>D 51: OO: 305; Frontal:<br>56; EDC: 27<br>D 147: OO: 114; Frontal:<br>49; EDC: US<br>D 51 after the second<br>one: OO: 123; Frontal:<br>90; EDC: 50<br>D 158 after the second<br>one: OO: 93; Frontal: 37;<br>EDC: 32                      |
|                         |                                                                                                                                       |                                                                                                                                  |                            |                                                                                            | #2<br>D 53: OO: 300; Frontalis:<br>>300; EDC: 44<br>D 188: OO: 83; Frontalis:<br>97; EDC: 33                                                                                                                                                                                                                                                                              |
|                         |                                                                                                                                       |                                                                                                                                  |                            |                                                                                            | #3<br>D 0: OO: 43; EDC: 30<br>D 3: OO: >300; EDC: 30<br>D 60: OO: US; EDC: 37                                                                                                                                                                                                                                                                                             |
|                         |                                                                                                                                       |                                                                                                                                  |                            |                                                                                            | #4<br>D 42: EDC: 40; BB: 66<br>D 100: EDC: 34; BB: 26                                                                                                                                                                                                                                                                                                                     |
| Lange et al. 1987 [2]   | #1/51/F<br>#2/58/F<br>#3/42/F<br>#4/49/F<br>#5/62/M<br>Dystonic disorders n=3<br>torticollis n = 1<br>oromandibular dystonia<br>n = 1 | Botox® (MLU)<br>2 injections for #1 and #2<br>#1: 285; 450<br>#2: 372; 687<br>#3: 100<br>#4: 302.5<br>#5: 245<br>First injection | EDC                        | Standard electrode<br>Peak-to-peak amplitude<br>>200 µV, rise time <300<br>µs,<br>20 pairs | #1: Before injection: 28<br>2 W after the 1 <sup>st</sup> one:<br>49.2<br>4 Mt after 2 <sup>nd</sup> one: 41<br>#2: 6 W after the 1 <sup>st</sup> one:<br>37<br>3 W after 2 <sup>nd</sup> one: 36<br>#3: 2 W after the 1 <sup>st</sup><br>injection: 27.1<br>#4: 3 W after the 1 <sup>st</sup><br>injection: 54.2<br>#5: 6 W after the 1 <sup>st</sup><br>injection: 65.2 |
|                         |                                                                                                                                       |                                                                                                                                  |                            |                                                                                            |                                                                                                                                                                                                                                                                                                                                                                           |
|                         |                                                                                                                                       |                                                                                                                                  |                            |                                                                                            |                                                                                                                                                                                                                                                                                                                                                                           |
|                         |                                                                                                                                       |                                                                                                                                  |                            |                                                                                            |                                                                                                                                                                                                                                                                                                                                                                           |

|                          |                                                                                                                                                                               |                                                                                                                                  |                                                                                                              |                                                                                                                                                                                                                                                                                                    |                                                                                                                                                                                                                                                                                                        |
|--------------------------|-------------------------------------------------------------------------------------------------------------------------------------------------------------------------------|----------------------------------------------------------------------------------------------------------------------------------|--------------------------------------------------------------------------------------------------------------|----------------------------------------------------------------------------------------------------------------------------------------------------------------------------------------------------------------------------------------------------------------------------------------------------|--------------------------------------------------------------------------------------------------------------------------------------------------------------------------------------------------------------------------------------------------------------------------------------------------------|
| Olney et al. 1988 [3]    | #1/48/F<br>#2/53/F<br>#3/64/F<br>#4/46/F<br>#5/62/M<br>#6/31/M<br>Torticollis n=6                                                                                             | One injection<br>280 UI<br>First injection                                                                                       | BB                                                                                                           | Dantec 1500; 13K87<br>Standard electrode<br>Peak-to-peak amplitude<br>>200 $\mu$ V, rise time <300<br>$\mu$ s, constant shape over<br>time. 50 to 100<br>consecutive discharges<br>of each 20 pairs of<br>voluntarily activated<br>single muscle fibers;<br>commercially available<br>jitter meter | #1: W 0: 26; W 2: 25; W<br>4: 29<br>#2: W 0: 28; W 2: 32; W<br>4: 39<br>#3: W 0: 30; W 4: 27<br>#4: W 0: 27; W 8: 41<br>#5: W 0: 30; W 10: 46<br>#6: W 0: 33; W 12: 46                                                                                                                                 |
|                          |                                                                                                                                                                               |                                                                                                                                  |                                                                                                              |                                                                                                                                                                                                                                                                                                    |                                                                                                                                                                                                                                                                                                        |
| Lange et al. 1991 [4]    | Torticollis n = 42                                                                                                                                                            | Botox® n = 23<br>Pb n = 19<br>One injection<br>Doses BoNT-A (U)<br>140, 150, 165<br>(detailed elsewhere [99])<br>First injection | EDC n = 36<br>BB n = 4<br>TA n = 2                                                                           | Standard electrode<br>Computer programs<br>TECA Mystro and<br>Nicolet Viking<br>Peak-to-peak amplitude<br>>200 $\mu$ V, rise time <300<br>$\mu$ s, constant shape over<br>time. At least 50<br>consecutive discharges<br>of each 20 pairs of<br>voluntarily activated                              | Before injection (n = 42)<br>EDC 21-30 (for both<br>groups)<br>BB 21.7<br>TA 28.8<br>Pb 25.7<br>2 W (n = 42)<br>EDC BoNT-A 43.6<br>Pb 26.5 <i>unchanged from<br/>preinjection p &lt; 0.05</i><br>BB: US<br>TA: US<br>12 W (n = 27)<br>EDC 35.5<br>Pb 24.5<br>BB: US<br>TA: US                          |
|                          |                                                                                                                                                                               |                                                                                                                                  |                                                                                                              |                                                                                                                                                                                                                                                                                                    |                                                                                                                                                                                                                                                                                                        |
| Girlanda et al. 1992 [5] | Sex US<br>#1 #2 #3 BSP<br>#4 HSF<br>#5 spasmodic torticollis with 2 <sup>nd</sup> dosage doubled                                                                              | Botox®<br>#1 #2 #3 #4 20 U<br>#5 65 U<br>2 sessions of injection<br>First injection                                              | EDC                                                                                                          | Standard electrode<br>20 pairs<br>Electromyograph BASIS<br>EPM (OTE<br>BIOMEDICA)                                                                                                                                                                                                                  | D 45 after the 1 <sup>st</sup><br>injection: 32.6<br>D 45 after 2 <sup>nd</sup> injection:<br>40<br>D 1, 4, 7, 14, 30 after 1 <sup>st</sup><br>injection and D 1, 4, 7,<br>14, 30, 60 and 90 after<br>2 <sup>nd</sup> injection: US for each<br>patient, data<br>represented on figure                 |
|                          |                                                                                                                                                                               |                                                                                                                                  |                                                                                                              |                                                                                                                                                                                                                                                                                                    |                                                                                                                                                                                                                                                                                                        |
| Garner et al. 1993 [6]   | #1/46/F/Perioral<br>dystonia<br>#2/40/F/Torticollis<br>#3/31/M/Torticollis<br>#4/66/M/Torticollis<br>#5/39/M/HSF<br>#6/58/F/MGS<br>#7/45/M/Torticollis<br>#8/57/F/Torticollis | First injection<br>One injection (ng):<br>#1: 5<br>#2: 22.5<br>#3: 15<br>#4: 20<br>#7: 15<br>#8: 20<br>#5: 2<br>#6: 6            | EDC all patients<br>Alternatively, right and<br>left sided muscles<br>Except #5 only right<br>+ TA for #1 #7 | Standard electrode<br>MEDELEC MS 20<br>Peak-to-peak amplitude<br>>500 $\mu$ V, rise time less<br>than 250 $\mu$ s<br>20 fiber pairs                                                                                                                                                                | Details given for<br>maximum MCD<br>#1: EDC: D 13: 142; TA:<br>D13: 129<br>#2: D 7: 121<br>#3 D: US: <i>normal</i><br>#4: D 6: 54.5<br>#5: D US: <i>normal</i><br>#6: D 11: 50.2<br>#7: EDC: D 7: 66.9; TA:<br>D5: 48<br>#8: D 3: 156                                                                  |
|                          |                                                                                                                                                                               |                                                                                                                                  |                                                                                                              |                                                                                                                                                                                                                                                                                                    |                                                                                                                                                                                                                                                                                                        |
| Girlanda et al. 1996 [7] | Age US; 3F/3M<br>BSP n = 6                                                                                                                                                    | Botox® 20 units<br>One injection<br>No detail about<br>injection past history                                                    | Bilateral OO                                                                                                 | Mystro Medelec MS25<br>Standard electrode<br>20 pairs<br>Electrophysiological<br>investigator blinded to<br>treatment                                                                                                                                                                              | Baseline: BoNT-A:<br>normal (<30 $\mu$ s); Pb:<br>around 25 $\mu$ s, [20 $\mu$ s-<br>30 $\mu$ s] W 1: BoNT-A:<br>mean 75 $\mu$ s, [50 $\mu$ s-100<br>$\mu$ s], p < 0.02; Pb: mean<br>35 $\mu$ s [25 $\mu$ s-42 $\mu$ s]; <i>non-<br/>significantly</i> W 2: BoNT-<br>A: mean 150 $\mu$ s, [50 $\mu$ s- |
|                          |                                                                                                                                                                               |                                                                                                                                  |                                                                                                              |                                                                                                                                                                                                                                                                                                    |                                                                                                                                                                                                                                                                                                        |

|                         |                                                                                                                                                                                                                                                                                           |                                                                                                                                                                                                                                                                                                                                                                                                                                                                                                                                                               |                                                                                                                                                                        |                                                                                                         |  |                                                                                                                                                                                                                                                                                                                                                                                                                                    |
|-------------------------|-------------------------------------------------------------------------------------------------------------------------------------------------------------------------------------------------------------------------------------------------------------------------------------------|---------------------------------------------------------------------------------------------------------------------------------------------------------------------------------------------------------------------------------------------------------------------------------------------------------------------------------------------------------------------------------------------------------------------------------------------------------------------------------------------------------------------------------------------------------------|------------------------------------------------------------------------------------------------------------------------------------------------------------------------|---------------------------------------------------------------------------------------------------------|--|------------------------------------------------------------------------------------------------------------------------------------------------------------------------------------------------------------------------------------------------------------------------------------------------------------------------------------------------------------------------------------------------------------------------------------|
|                         |                                                                                                                                                                                                                                                                                           |                                                                                                                                                                                                                                                                                                                                                                                                                                                                                                                                                               |                                                                                                                                                                        |                                                                                                         |  | 250μs], p < 0.01; Pb: mean 41 μs [32μs-48μs], p < 0.01 Mt 1: BoNT-A: mean 125 μs, [50 μs-175μs], p < 0.02; Pb: between 36 and 38 μs, p < 0.02<br>Data detailed in figures                                                                                                                                                                                                                                                          |
| Bogucki et al. 1999 [8] | #1/45/F/MGS<br>#2/67/F/BSP<br>#3/64/F/HSF<br>#4/71/M/BSP<br>#5/41/F/BSP<br>#6/84/F/BSP<br>#7/47/F/HSF<br>#8/59/F/HSF<br>#9/65/F/HSF<br>#10/58/F/MGS<br>#11/72/F/BSP<br>#12/51/F/BSP<br>#13/73/F/MGS<br>#14/69/F/BSP<br>#15/42/M/BSP<br>#16/63/M/MGS<br>BSP n = 8; MGS n = 4;<br>HSF n = 4 | Dysport®<br>120 UI/ muscle<br>One injection<br>Bilateral for BSP<br>One side for HSF<br>First injection                                                                                                                                                                                                                                                                                                                                                                                                                                                       | OO                                                                                                                                                                     | Mk2 Dantec 13K87,<br>Denmark<br>Standard electrode<br>Slight voluntary<br>contraction of OO<br>20 pairs |  | Before injection: 22.7 ± 2.5; n = 16<br>Early remission (D 7-14; mean 9.9 ± 2.2): 99.9 ± 50.1; n = 15/16<br>Late remission (D 23-57; mean 35.6 ± 11.6): 96.3 ± 35.1; n = 15/16<br>When dystonic movements occurred (D 57-265; mean 116.7 ± 52.5): 59.8 ± 18.8; n = 13/16<br>decrease in jitter was noted compared to pretreatment (p < 0.0005), 1 <sup>st</sup> (p < 0.015) and 2 <sup>nd</sup> (p < 0.002) posttreatment analysis |
| Bakheit et al. 1997 [9] | #1/67/F/MS<br>#2/34/F/MSA with torticollis                                                                                                                                                                                                                                                | Dysport®<br>#1 250 U for left leg<br>#2 750 U<br>250 in right SCM and left splenius capitis - 500 in left trapezius                                                                                                                                                                                                                                                                                                                                                                                                                                           | EDC                                                                                                                                                                    | Standard electrode                                                                                      |  | Interval US<br>#1 ranged from 92.6 to 408<br>#2 US                                                                                                                                                                                                                                                                                                                                                                                 |
| Bhatia et al. 1999 [10] | #1/45/F/Cervical dystonia<br>#2/57/F/Symptomatic hemidystonia<br>#3/32/F/Symptomatic hemidystonia                                                                                                                                                                                         | Dysport®<br>One injection<br>#1: 650 UI: SCM 300, Left splenius capitus 300, Right splenius capitus 200<br>History of 650 UI<br>Dysport® at 12-14 intervals weeks between November 1989 and 1995<br>#2: Total dose 900 UI<br>Dysport®<br>Previous: March 1989 – October 1991: 30 months of injections, total dose at each visit ranged from 350 -800 UI at intervals of 10-12W<br>#3: History: Since January 1988, at 8 and 10 W intervals with an average dose of 600 UI at each visit<br>October 1990 in addition to usual injections further dose of 200UI | #1<br>1 <sup>st</sup> SFEMG right EDC<br>2 <sup>nd</sup> SFEMG right EDC<br>Deltoid iliopsoas<br>3 <sup>rd</sup> SFEMG right EDC<br>#2<br>Right EDC and BB<br>#3<br>US | Standard electrode<br>#1<br>10 pairs                                                                    |  | #1<br>W 2: 93.6<br>Mt 4: No precise data: <i>excessive jitter</i><br>Mt 9: Normal 20.1<br>#2<br>Mt 2: BB: normal; EDC: no data precision: <i>3/11 pairs showed abnormal jitter</i><br>#3<br>Mt2: No data: normal                                                                                                                                                                                                                   |

|                             |                                                                                                                                                                                                                                                                                        | given into left<br>gastrocnemius                                                                                                                                                                                                                |                                               |                                                                                                                                                                                                                                                                                              |                                                                                                                                                                                                                                                                                                                                                                                                                        |
|-----------------------------|----------------------------------------------------------------------------------------------------------------------------------------------------------------------------------------------------------------------------------------------------------------------------------------|-------------------------------------------------------------------------------------------------------------------------------------------------------------------------------------------------------------------------------------------------|-----------------------------------------------|----------------------------------------------------------------------------------------------------------------------------------------------------------------------------------------------------------------------------------------------------------------------------------------------|------------------------------------------------------------------------------------------------------------------------------------------------------------------------------------------------------------------------------------------------------------------------------------------------------------------------------------------------------------------------------------------------------------------------|
| Schweizer et al. 1999 [11]  | 73/Sex US<br>SFEMG studied n = 10<br>BoNT-A injection for<br>spasmodic dysphonia n<br>= 1                                                                                                                                                                                              | periodically injected<br>since 1990<br>dose US                                                                                                                                                                                                  | laryngeal muscles                             | CNE                                                                                                                                                                                                                                                                                          | 7 Mt after the last<br>injection: 40.7                                                                                                                                                                                                                                                                                                                                                                                 |
| Tang et al. 2000 [12]       | Patients injected Botox®<br>n=192;<br>CBTX-A® n=593<br>only 40 SFEMG<br>5-82/28F/12M<br>HSF n=17; BSP n = 8<br>MGS Syndrome n = 2<br>Cervical dystonia n = 13<br>Botox® n = 18<br>CBTX-A® n = 22                                                                                       | Botox® 99.4 UI (30-300)<br>CBTX-A 107.3 UI (30-<br>300 UI)                                                                                                                                                                                      | EDC<br>TA                                     | Counterpoint MKII<br>Dantec<br>Standard electrode                                                                                                                                                                                                                                            | Before: normal for both<br>Botox® and CBTX-A®<br>W 2-3: Botox®:<br>EDC 29.9 to 36.2 (+21%,<br>p<0.01); CBTX-A®: EDC<br>28.5 to 36.4 (+27%,<br>p<0.01<br>W 5-8 and Mt 4-5: Data<br>shown in figure only                                                                                                                                                                                                                 |
| Roche et al. 2008 [13]      | Patients from a cohort of<br>187 patients<br>Dysport® n = 33<br>Botox® n = 233)<br>25-59<br>#1/25/M/MS<br>#2/32/F/Paraplegia<br>#3/42/F/Hemiplegic<br>#4/59/F/Hemiplegic                                                                                                               | Dysport®<br>#1 1000 UI<br>#21500 UI<br>#3 1000 UI<br>#4 1000 UI<br>One injection for all<br>Previous:<br>#1 Botox®400 UI/<br>Dysport®1000 UI<br>#2 Botox®500 UI<br>#3 Botox®300 UI<br>#4 Botox®400 UI /<br>Dysport® 1000 UI                     | #1 EDC<br>#2 EDC<br>#3 OO<br>#4EDC            | Nicolet Viking II<br>electromyography<br>Standard electrode<br>Stimulated technique<br>frequency of 10 Hz<br>Peak-to-peak amplitude<br>> 200 µV, rise time < 300<br>µs, constant shape over<br>time. 100 consecutive<br>discharges of each 20<br>pairs of stimulated<br>single muscle fibers | #1: D34: 31.1; Mt 3: 25.2<br>#2: D27: 54.22; Mt 3: 23.8<br>#3: D30: 31.31<br>#4: D31: 33.09                                                                                                                                                                                                                                                                                                                            |
| Osio et al. 2010 [14]       | BoNT-1 group n = 14<br>Pb group n = 10<br>BoNT-A group M/F =<br>0.2<br>Pb group M/F = 0.3<br>Obesity n = 24                                                                                                                                                                            | Botox® 200 UI<br>One injection<br>First injection                                                                                                                                                                                               | Right EDC                                     | Voluntary contraction<br>No data for all devices<br>except the needle: <i>single<br/>fiber needle Oxford<br/>Instruments</i><br>20 pairs registered<br>Calculation<br>methodology not<br>detailed<br>refer to a bibliographic<br>reference [25]                                              | BoNT-A n = 14/14<br>Pb n = 9/10 (1 refused<br>SF)<br>Pretreatment: BoNT-A<br>29.12; SD 4.38;<br>Pb 29.44; SD 3.64<br>D 8: BoNT-A 29.59; SD<br>3.55<br>Pb 27.67; SD 3.84<br>Jitter change (post-pre)<br>95% confidence interval<br>BoNT-A -1.85; 2.79; p =<br>0.674<br>Pb -5.73; 2.17; p = 0.330<br>EDC 17/18: mean jitter<br>18.9 µs<br>OO: mean 22.2 µs<br>D 26 ± 8 after injection<br>Details of each patient<br>(D) |
| Schnitzler et al. 2011 [15] | 42.1 ± 14.4; sex US<br>#1/60; #2/29; #3/29; #4/50;<br>#5/63; #6/28 #7/39;<br>#8/56; #9/38; #10/50;<br>#11/22; #12/43;<br>#13/34;<br>#14/64; #15/47; #16/26;<br>#17/23; #18/65; #19/38;<br>#20/57; #21/24<br>8F/13M<br>Medullary lesion with<br>neurogenic overactive<br>bladder n = 21 | Botox®<br>300UI<br>One injection<br>First injection n = 2/21<br>N = 19/21<br>Mean number of<br>injections prior to study<br>inclusion: 2.6 ± 1.7 (0-6<br>injections)<br>Average interval<br>between BoNT-A<br>injections Mt 6 ± 1 (Mt 4-<br>12) | EDC n = 18/21<br>OO n = 3/21:<br>#5; #13; #17 | Viking EMG II<br>Stimulated SFEMG<br>Peak-to-peak amplitude<br>>200 µV, rise time <300<br>µs, constant shape over<br>time,<br>100 consecutive<br>discharges of 20 pairs                                                                                                                      | Details of each patient<br>#1: D 29: 24.90; #2: D30:<br>15.90; #3: D14: 21.05; #4:<br>D24: 24.17; #5: D50:<br>25.90; #6: D 25: 19.50; #7:<br>D 15: 21.20; #8: D 21:<br>23.40; #9: D 24: 15.50;<br>#10: D 30: 19.09; #11: D<br>17: 22.15; #12: D 34:<br>37.50; #13: D 34: 20; #14:<br>D 24: 17.17; #15: D 22:                                                                                                           |

|                                  |                                                                                                                                                                                                                                                                                         |                                                                                                                                        |                                                                                    |                                                                    |  |                                                                                                                                                                                                                                                                                                                                                                                                                                                                                                                                                                                                                                                                                                                                                      |
|----------------------------------|-----------------------------------------------------------------------------------------------------------------------------------------------------------------------------------------------------------------------------------------------------------------------------------------|----------------------------------------------------------------------------------------------------------------------------------------|------------------------------------------------------------------------------------|--------------------------------------------------------------------|--|------------------------------------------------------------------------------------------------------------------------------------------------------------------------------------------------------------------------------------------------------------------------------------------------------------------------------------------------------------------------------------------------------------------------------------------------------------------------------------------------------------------------------------------------------------------------------------------------------------------------------------------------------------------------------------------------------------------------------------------------------|
|                                  |                                                                                                                                                                                                                                                                                         |                                                                                                                                        |                                                                                    |                                                                    |  | 23.47; #16: D 36: 20.90;<br>#17: D24: 20.8; #18: D 28:<br>18.45; #19: D 24: 15.60;<br>#20: D 25: 15.20; #21: D<br>22: 15.30                                                                                                                                                                                                                                                                                                                                                                                                                                                                                                                                                                                                                          |
|                                  |                                                                                                                                                                                                                                                                                         |                                                                                                                                        |                                                                                    |                                                                    |  | Baseline: mean 28 (23-<br>32) whole group<br>W 2: for 12 intervention<br>subjects, increased to 35<br>(30-39), $p < 0.001$<br>Pb: 29<br>-Individual (only<br>detailed for W 0-2)<br>Baseline<br>Pb: Median 28.7; Mean<br>28.8 ± 1.7<br>5 UI: Median 25.8; Mean<br>25.8 ± 3.1<br>10 UI: Median 28.1<br>Mean 28.1 ± 0.8<br>20 UI: Median 29.1;<br>Mean 29.1 ± 2.7<br>W 2<br>Pb: Median 29.3; Mean<br>29.3 ± 2.4<br>5 UI: Median 33.9; Mean<br>33.9 ± 4.2<br>10 UI: Median 34.4<br>Mean 35.1 ± 2.7<br>20 UI: Median 37.1;<br>Mean 36.4 ± 2.5<br>-Mean change between<br>W 0-2<br>Pb group 1.9 ± 11.6 % $p$<br>= 0.76<br>5 UI group 32.8 ± 23.8 %<br>$p = 0.070$<br>10 UI group 24.9 ± 10.6 %<br>$p = 0.018$<br>20 UI group 26.1 ± 16.8<br>% $p = 0.053$ |
| Alimohammadi et al.<br>2014 [16] | Age US; 16F/0M<br>Healthy n = 16                                                                                                                                                                                                                                                        | <i>Vistabel</i><br>Each group n = 4<br>5 UI<br>10 UI<br>20 UI<br>Pb group<br>One injection<br>First injection                          | OO                                                                                 | Keypoint Medtronic<br>Slight voluntary<br>contraction,<br>20 pairs |  |                                                                                                                                                                                                                                                                                                                                                                                                                                                                                                                                                                                                                                                                                                                                                      |
| Punga et al. 2015 [17]           | 33-52/5F; Sex US<br>Visible glabellar frown<br>lines at rest n = 5                                                                                                                                                                                                                      | <i>Vistabel</i><br>Onabotulinumtoxin A<br>Total dose : 2.5 UI n= 1;<br>5 UI n = 3;<br>10 UI n = 1;<br>One injection<br>First injection | contralateral frontalis<br>muscle                                                  | Keypoint Medtronic<br>20 pairs                                     |  | 28 range 25-32<br>34 range 27-39 $p = 0.05$                                                                                                                                                                                                                                                                                                                                                                                                                                                                                                                                                                                                                                                                                                          |
| Ruet et al. 2015 [18]            | Age & Sex US<br>SFEMG n = 35 patients<br>presented side effects<br>after BoNT-A injection,<br>categorized into:<br>Fatigue group n = 15;<br>age 48 ± 14<br>Pseudo-botulism group<br>n = 20; age 41 ± 11<br>Control group n = 17;<br>age 43 ± 13<br>Botulism group n = 3;<br>age 53 ± 24 | Botox® / Dysport®<br>Fatigue group 10/4 *<br>Pseudo-botulism group<br>15/4 *<br>Control group 17/0                                     | EDC/OO<br>Fatigue group 8/7<br>Pseudo-botulism group<br>11/9<br>Control group 15/2 | Neuropack M1<br>20 pairs                                           |  | Fatigue group: D 36 ± 21<br>EDC 20.5 ± 2.8 (15.0 –<br>33.1)<br>OO 20.8 ± 3.17 (16.6 –<br>31.6)<br>Pseudo-botulism group:<br>D 42 ± 24<br>EDC 42.2 ± 24.4 (21.5 -<br>110.9)<br>OO 21.7 ± 8.7 (13.8 -<br>31.3)<br>Control group: D 24 ± 8                                                                                                                                                                                                                                                                                                                                                                                                                                                                                                              |

|                             |                                                                                                                                        |                                                                                                                                                                                                                                                                                                                            |                                                                  |                                                                                                                              |                                                                                                                                                                                                                                                                                                                              |
|-----------------------------|----------------------------------------------------------------------------------------------------------------------------------------|----------------------------------------------------------------------------------------------------------------------------------------------------------------------------------------------------------------------------------------------------------------------------------------------------------------------------|------------------------------------------------------------------|------------------------------------------------------------------------------------------------------------------------------|------------------------------------------------------------------------------------------------------------------------------------------------------------------------------------------------------------------------------------------------------------------------------------------------------------------------------|
|                             |                                                                                                                                        |                                                                                                                                                                                                                                                                                                                            |                                                                  |                                                                                                                              | EDC $20.9 \pm 7.2$ (15.2 – 37.5)<br>OO $22.9 \pm 2.9$ (20 – 25.9)<br>EDC: Jitter significantly higher in the pseudo-botulism group than in the control ( $p < 0.001$ ) and fatigue group ( $p = 0.0005$ )<br>No difference between fatigue and control group<br>OO: no significant difference between groups                 |
| Szuch et al. 2017 [19]      | Age & Sex US<br>N = 1<br>right foot dystonia with iatrogenic botulism (head drop, bulbar and systemic weakness in Parkinson's disease) | Botox®<br>4 M from previous one<br>Total 600 UI 5 <sup>th</sup> injection:<br>EHL 50; FDL 150<br>Gastrocnemius 150<br>Peroneus longus 150<br>Soleus 100<br>Previous injections:<br>1 <sup>st</sup> and 2 <sup>nd</sup> "preparation and dose unknown"<br>3 <sup>rd</sup> 400 UI time US<br>4 <sup>th</sup> 600 UI 5M later | Left EDC                                                         | Nicolet Viking IV<br>Voluntary SFEMG<br>Upper limit 43.8<br>+ Stimulated SFEMG<br>Upper limit 25<br>Methodology not detailed | Voluntary SFEMG: D 21<br>8 pairs with mean jitter 66.24 (norm set at 43.8 $\mu$ s)<br>Stimulated SFEMG: D 21<br>16 pairs with mean 52.74 (norm set below 25 $\mu$ s)                                                                                                                                                         |
| Lispi et al. 2018 [20]      | Age US; 2F/8M<br>mean 53<br>Healthy n = 10                                                                                             | Incobotulinumtoxin A<br>Merz®<br>15 UI each patient<br>One injection<br>First injection                                                                                                                                                                                                                                    | EDB bilaterally                                                  | Medelec Synergy using a concentric needle described elsewhere [26]                                                           | Baseline: $28 \pm 7.5$<br>W1: $33 \pm 6.7$<br>W2: $45 \pm 9.2$<br>W3: $55 \pm 8.1$<br>W4: $111 \pm 10.1$<br>W 6: $120 \pm 9.5$<br>W 8: $142 \pm 6.3$<br>W 10: $110 \pm 11.3$<br>W 12: $66 \pm 8.5$                                                                                                                           |
| Leonardi et al. 2019 [21]   | #1/48/F/MS<br>#2/32/M/CP                                                                                                               | #1 Botox®: 400 UI<br>2 Mt later: 600 UI<br>5 Mt later: 400 UI<br>#2 : Dysport®: 1500 UI                                                                                                                                                                                                                                    | #1 left deltoid<br>#2 EDC                                        | US                                                                                                                           | #1: Mt 5: 111.4<br>#2: D 10: 75.6                                                                                                                                                                                                                                                                                            |
| Timmermans et al. 2019 [22] | 43/M                                                                                                                                   | Azzalure®<br>84 UI<br>Previous<br>Similar injection 2 years earlier                                                                                                                                                                                                                                                        | Left OO                                                          | US                                                                                                                           | W 6: 112                                                                                                                                                                                                                                                                                                                     |
| Punga et al. 2020 [23]      | #1/55/F/wrinkles<br>#2/46/M/migraine                                                                                                   | #1<br>Dose: no data<br>Previous injections<br>Also received regular BONT-A injections at a beauty clinic<br>#2<br>14 treatments of 155 UI of Dysport® divided between a total of 31 points ( $\approx 3$ UI/injection point)                                                                                               | #1<br>Left OO<br>Left frontalis<br>Left Deltoid<br>#2<br>Left OO | CNE<br>Voluntary technique<br>No device cited                                                                                | #1: 1 Mt and a few days<br>OO 125 $\mu$ s, 60% increased jitter,<br>Frontalis: No precise data: increased jitter 70%<br>Mt 2: OO: 62 $\mu$ s;<br>Frontalis: jitter was increased<br>Deltoid 25 $\mu$ s, normal<br>#2: W 2: OO: 37 $\mu$ s;<br>increased jitter 38%<br>Mt 4: Jitter analysis in the left OO [...] also normal |

|  |  |  |  |                   |
|--|--|--|--|-------------------|
|  |  |  |  | Before            |
|  |  |  |  | BoNT-A 25.5 (13)  |
|  |  |  |  | BoNT-B 25.5 (11)  |
|  |  |  |  | BoNT- C 24.5 (12) |
|  |  |  |  | BoNT-F 25 (12)    |
|  |  |  |  | Placebo 26 (13)   |
|  |  |  |  | W 2               |
|  |  |  |  | BoNT-A 89 (35)    |
|  |  |  |  | BoNT-B 78 (38)    |
|  |  |  |  | BoNT- C 80 (30)   |
|  |  |  |  | BoNT-F 108 (25)   |
|  |  |  |  | Placebo 28 (14)   |
|  |  |  |  | W 4               |
|  |  |  |  | BoNT-A 72.5 (25)  |
|  |  |  |  | BoNT-B 69 (18)    |
|  |  |  |  | BoNT- C 69 (26)   |
|  |  |  |  | BoNT-F 90 (30)    |
|  |  |  |  | Placebo 30 (11)   |
|  |  |  |  | W 6               |
|  |  |  |  | BoNT-A 67 (19)    |
|  |  |  |  | BoNT-B 71 (22)    |
|  |  |  |  | BoNT- C 65 (27)   |
|  |  |  |  | BoNT-F 84 (29)    |
|  |  |  |  | Placebo 24 (15)   |
|  |  |  |  | W 8               |
|  |  |  |  | BoNT-A 52 (22)    |
|  |  |  |  | BoNT-B 63 (28)    |
|  |  |  |  | BoNT- C 55 (18)   |
|  |  |  |  | BoNT-F 51 (20)    |
|  |  |  |  | Placebo 27 (13)   |

In italics: cited from original text#: Patient; \*: missing data; ADM: abductor digiti minimi; BB: biceps brachialis; BSP: blepharospasm; CBTX-A®: Chinese type A botulinum toxin; CP: cerebral palsy; D: day; EDB: extensor digitorum brevis; EDC: Extensor digitorum communis; EHL: extensor hallucis longus; F: female; FDL: flexor digitorum longus; FDP: flexor digitorum profundus; FDS: flexor digitorum superficialis; FHL: flexor hallucis longus; FRC: flexor carpi radialis; HSF: hemifacial spasm; HSP: Hereditary spastic paraparesis; M: male; MCD: Mean consecutive difference; MGS: Meige Syndrome; MLU: Mouse lethal unit; MS: multiple sclerosis; MSA: multiple system atrophy; Mt: Month; MU: Mouse unit: 2.5 ng of Botox® = 1 U = mouse LD50 (99); OO: orbicularis muscle; Pb: placebo; SCM: sternocleidomastoid; SD: standard deviation; TA: tibialis anterior; TS: triceps solear; UI: international unit; US: unspecified; W: week.

## References

1. Sanders, D.B.; Massey EW; Buckley EG. Botulinum toxin for blepharospasm: Single-fiber EMG studies. *Neurol* **1986**, *36*, 545–547.
2. Lange, D. J., Brin, M. F., Warner, C. L., Fahn, S., Lovelace, R. E. Distant effects of local injection of botulinum toxin. *Muscle Nerve* **1987**, *10*, 552–555.
3. Olney, R. K., Aminoff, M. J., Gelb, D. J., Lowenstein, D. H. Neuromuscular effects distant from the site of botulinum neurotoxin injection. *Neurol* **1988**, *38*, 1780–1783.
4. Lange, D.J.; Rubin, M.; Greene, P.E.; Kang, U.J.; Moskowitz, C.B.; Brin, M.F.; Lovelace, R.E. Fahn, S., Distant effects of locally injected botulinum toxin: A double-blind study of single fiber EMG changes. *Muscle Nerve* **1991**, *14*, 672–675.
5. Girlanda, P.; Vita, G.; Nicolosi, C.; Milone, S.; Messina, C. Botulinum toxin therapy: Distant effects on neuromuscular transmission and autonomic nervous system. *J Neurol Neurosurg Psychiatry* **1992**, *55*, 844–845.
6. Garner, C.G.; Straube, A.; Witt, T.N.; Gasser, T.; Oertel, W. H. Time course of distant effects of local injections of botulinum toxin. *Mov Disord Off J Mov Disord Soc* **1993**, *8*, 33–37.



7. Girlanda, P.; Quartarone, A.; Sinicropi, S.; Nicolosi, C.; Messina, C. Unilateral injection of botulinum toxin in blepharospasm: Single fiber electromyography and blink reflex study. *Mov Disord Off J Mov Disord Soc* **1996**, *11*, 27–31.
8. Bogucki, A. Serial SFEMG studies of orbicularis oculi muscle after the first administration of botulinum toxin. *Eur J Neurol* **1999**, *6*, 461–467.
9. Bakheit, A.M.; Ward, C.D.; McLellan, D.L. Generalised botulism-like syndrome after intramuscular injections of botulinum toxin type A: A report of two cases. *J Neurol Neurosurg Psychiatry* **1997**, *62*, 198.
10. Bhatia, K.P.; Münchau, A.; Thompson, P.D.; Houser, F.; Chauhan, V.S.; Hutchinsin, M.; Shapira, A.H.V.; Marsden, C.D. Generalised muscular weakness after botulinum toxin injections for dystonia: A report of three cases. *J Neurol Neurosurg Psychiatry* **1999**, *67*, 90–93.
11. Schweizer, V.; Woodson, G.E.; Bertorini, T.E. Single-fiber electromyography of the laryngeal muscles. *Muscle Nerve* **1999**, *22*, 111–114.
12. Tang, X.; Wan, X. Comparison of Botox with a Chinese type A botulinum toxin. *Chin Med J (Engl)* **2000**, *113*, 794–798.
13. Roche, N.; Schnitzler, A.; Genêt, F.F.; Durand, M. C.; Bensmail, D. Undesirable distant effects following botulinum toxin type a injection. *Clin Neuropharmacol* **2008**, *31*, 272–280.
14. Osio, M.; Mailland, E.; Muscia, F.; Nascimbene, C.; Vanotti, A.; Bana, C.; Corsi, F.; Foschi, D.; Mariani, C. Botulinum neurotoxin-A does not spread to distant muscles after intragastric injection: A double-blind single-fiber electromyography study. *Muscle Nerve* **2010**, *42*, 165–169.
15. Schnitzler, A.; Genet, F.; Durand M-C.; Roche, N.; Bensmail, D.; Chartier-Kastler, E.; Denys, P. Pilot study evaluating the safety of intradetrusor injections of botulinum toxin type A: Investigation of generalized spread using single-fiber EMG. *Neurourol Urodyn* **2011**, *30*, 1533–1537.
16. Alimohammadi, M.; Andersson, M.; Punga, A.R. Correlation of botulinum toxin dose with neurophysiological parameters of efficacy and safety in the glabellar muscles: A double-blind, placebo-controlled, randomized study. *Acta Derm Venereol* **2014**, *94*, 32–37.
17. Punga, A.R.; Eriksson, A.; Alimohammadi, M. Regional diffusion of botulinum toxin in facial muscles: A randomised double-blind study and a consideration for clinical studies with split-face design. *Acta Derm Venereol* **2015**, *95*, 948–951.
18. Ruet, A.; Durand, M.C.; Denys, P.; Lofaso, F.; Genet, F.; Schnitzler, A. Single-fiber electromyography analysis of botulinum toxin diffusion in patients with fatigue and pseudobotulism. *Arch Phys Med Rehabil* **2015**; *96*, 1103–1109.
19. Szuch, E.; Caress, J.B.; Paudyal, B.; Brashear, A.; Cartwright, M. S.; Strowd III, R. E. Head drop after botox: Electrodiagnostic evaluation of iatrogenic botulinum toxicity. *Clin Neurol Neurosurg* **2017**, *156*, 1–3.
20. Lispi, L.; Leonardi, L.; Petrucci, A. Longitudinal neurophysiological assessment of intramuscular type-A botulin toxin in healthy humans. *Neurol Sci Off J Ital Neurol Soc Ital Soc Clin Neurophysiol* **2018**, *39*, 329–332.
21. Leonardi, L.; Haggiag, S.; Petrucci, A.; Lispi, L. Electrophysiological abnormalities in iatrogenic botulism: Two case reports and review of the literature. *J Clin Neurosci Off J Neurosurg Soc Australas* **2019**, *60*, 138–141.
22. Timmermans, G.; Depierreux, F.; Wang, F.; Hansen, I.; Maquet, P. Cosmetic Injection of Botulinum Toxin Unmasking Subclinical Myasthenia Gravis: A Case Report and Literature Review. *Case Rep Neurol* **2019**, *11*, 244–251.
23. Punga, A.R.; Liik, M. Botulinum toxin injections associated with suspected myasthenia gravis: An underappreciated cause of MG-like clinical presentation. *Clin Neurophysiol Pract* **2020**, *5*, 46–49.
24. Eleopra, R.; Rinaldo, S.; Montecucco, C.; Rossetto, O.; Devigili, G. Clinical duration of action of different botulinum toxin types in humans. *Toxicon Off J Int Soc Toxinology*. Epub ahead of print 14 March 2020, doi:10.1016/j.toxicon.2020.02.020.
25. Ekstedt, J.; Nilsson, G.; Stalberg, E. Calculation of the electromyographic jitter. *J Neurol Neurosurg Psychiatry* **1974**, *37*, 526–539.

- 
26. Benatar, M.; Hammad, M.; Doss-Riney, H. Concentric-needle single-fiber electromyography for the diagnosis of myasthenia gravis. *Muscle Nerve* **2006**, *34*, 163–168.
